# Supplementary material
Source: MDPI journal article supplement (https://www.mdpi.com/2313-433X/7/3/60)
Supplement: s1 [file s1]

# Supplementary Materials: An Ontological Framework to Facilitate Early Detection of 'Radicalization' (OFEDR) –A Three World Perspective

Linda Wendelberg \* <sup>1,†</sup>  <https://orcid.org/0000-0002-1339-469X>

## <sup>1</sup> Results from Literature Search

Table S1: A non-exhaustive example of sources, which may be of relevance for development of an ontology about IBBB's for EA and radicalization.

| Name                      | Description       | Type              |
|---------------------------|-------------------|-------------------|
| NBO [1]                   | Neuroscience      | Ontology          |
| Allen Brain Map [2]       | Neuroscience      | Ontology          |
| Geneontology [3,4]        | Genes             | Ontology          |
| Varoquaux, 2018 [5]       | Cognitive         | Ontology          |
|                           | Brain Mapping     |                   |
| Monarch Initiative [6,7]  | Phenotype         | Ontology          |
| EMBL [8]                  | Human             | Ontology          |
|                           | Disease           |                   |
| MFOEM [9]                 | Emotion           | Ontology          |
| MF [10]                   | Cognition Traits  | Ontology          |
|                           | Disease Disorders |                   |
| ONL-MSA [11]              | Mental State      | Ontology          |
|                           | Assessment        |                   |
| NIO [12]                  | Neuropsychology   | Ontology          |
|                           | Brain Area        |                   |
|                           | Cognitive         |                   |
| APAONTO [13]              | Psychology        | Ontology          |
| Etudo, 2017 [?] ]         | Terrorism         | Ontology          |
|                           | system            |                   |
| BrainMap [14,15]          | Neuroscience      | Database          |
| GTD [16,17]               | Terrorism         | Database          |
| Poldrack, 2016 [18]       | Cognitive         | Article           |
| Haendel, 2018 [19]        | Medicine          | Article           |
| Barhamgi, 2018 [20]       | Radicalization    | Article           |
|                           | Social Networks   |                   |
| Barhamgi, 2018 [21]       | Radicalization    | Article           |
|                           | Social Networks   | Article           |
| Rodrigues, 2014 [22]      | Behavior          | Article           |
| Masmoudi, 2018 [23]       | Radicalization    | Article           |
|                           | Online messages   |                   |
| Mannes, 2005 [24]         | Terrorism         | Article           |
| Galjano, 2009 [25]        | Terrorism         | Article           |
| ICCT[26]                  | Counter-Terrorism | Think and do tank |
| BOCV [27]                 | Research Guide    | Library           |
| Perspectives on Terrorism | Terrorism         | Journal           |
| JD                        | Radicalization    | Journal           |
| Terror Polit Violenc.     | Terrorism         | Journal           |
| Stud. Confl. Terror.      | Terrorism         | Journal           |
| Crit Stud Terror          | Terrorism         | Journal           |
| Behav. Sci. Terror.       | Terrorism         | Journal           |
| Political Aggress.        |                   |                   |
| IJCWT                     | Terrorism         | Journal           |
| J. Polic. Intell.         | Terrorism         | Journal           |
| Count. Terror.            |                   |                   |

## 2 SPARQL Query Examples &amp; Information about Test Samples

Table S2: SPARQL Queries. Values that are not from real data sample are assumed based on peer reviewed publications. \*value also given to control group to increase difficulty

| Query                                                        | Real Data<br>Yes/No | Statistical<br>About                           | Scientific<br>Evidence | Modification<br>Abstraction                                              | New<br>Score           |
|--------------------------------------------------------------|---------------------|------------------------------------------------|------------------------|--------------------------------------------------------------------------|------------------------|
| <b>Model I</b>                                               |                     | No individuals from control group was detected |                        |                                                                          |                        |
| ?individual onto:hasSmallerPupil ?PupilDiameter .            | Yes                 |                                                | Small                  | less insula activation?[29]                                              | Medium                 |
| ?individual onto:hasShorterFixFetishStimuli ?fixationShort . | Yes                 |                                                | Small                  | different profiles for sex[28]                                           | medium                 |
| ?individual onto:hasLongFixAllStimuli ?fixationLong .        | Yes                 |                                                | Small                  | depend on stimuli if familiarity                                         | Moderate/<br>Large     |
| ?individual onto:hasAmbientChangeToPositive ?Ambient .       | Yes                 |                                                | Small                  | few studies with evidence acting out but exist                           | small                  |
| ?individual onto:hasFocalChangeToNegative ?Focal .           | Yes                 |                                                | Small                  | can relate to sexual change=evidence-high                                | Large                  |
| ?individual onto:hasRadicaleValuesBeliefs ?ValuesBeliefs*    | No                  |                                                | Large                  | High evidence                                                            | Very /<br>Large        |
| <b>Model II</b>                                              |                     | No individuals from control group was detected |                        |                                                                          |                        |
| ?individual onto:hasRadicaleValuesBeliefs ?ValuesBeliefs .   | No                  |                                                | Large                  | high evidence                                                            | Large<br>Very<br>Large |
| ?individual onto:hasSmallerPupil ?PupilDiameter .            | Yes                 |                                                | Small                  | less insula activation?[29]                                              | Medium                 |
| ?individual onto:hasAmbientChangeToPositive ?Ambient .       | Yes                 |                                                | Small                  | few studies evidence-acting out but exist                                | small                  |
| ?individual onto:hasFocalChangeToNegative ?Focal             | Yes                 |                                                | Small                  | if use findings sexual change                                            | Large                  |
| <b>Model III</b>                                             |                     | No individuals from control group was detected |                        |                                                                          |                        |
| ?individual onto:hasLowSelf_Esteem ?SelfEsteem.              | Yes                 |                                                | Large                  | evidence high                                                            | Very<br>Large          |
| ?individual onto:hasProlongAvrLatency ?Latency.              | Yes                 |                                                | Medium                 | depend on stimuli type not use single variable                           | small                  |
| ?individual onto:hasAge18-30 ?Age .                          | Yes                 |                                                | Medium                 | related to terrorism some evidence young higher sensitivity EA           | Medium                 |
| ?individual onto:hasSmallerPupil ?PupilDiameter .            | Yes                 |                                                | Small                  | less insula activation?[29]                                              | Medium                 |
| <b>Model IV</b>                                              |                     | No individuals from control group was detected |                        |                                                                          |                        |
| ?individual onto:hasSmallerPupil ?PupilDiameter .            | Yes                 |                                                | Small                  | less insula activation?[29]                                              | Medium<br>Small        |
| ?individual onto:hasChangeSerotonin ?Serotonin .             | No                  |                                                |                        | few exact studies EA worsens psychiatric symptoms                        | Small                  |
| ?individual onto:hasLowSelf_Esteem ?SelfEsteem .             | Yes                 |                                                | Large                  | high evidence                                                            | Very<br>Large          |
| ?individual onto:hasRedBodyAwareness ?BodyAwareness .        | No                  |                                                | Medium                 | consistent with other evidence e.g., insula                              | High                   |
| <b>Model V</b>                                               |                     | No individuals from control group was detected |                        |                                                                          |                        |
| ?individual onto:hasSmallerPupil ?PupilDiameter .            | Yes                 |                                                | Small                  | less insula activation?[29]                                              | Medium                 |
| ?individual onto:hasHighSelfEsteem ?SelfEsteem .             | Yes                 |                                                | Medium                 | evidence high<low different pattern                                      | Medium                 |
| ?individual onto:hasHighExtraversion ?Extraversion .         | Yes                 |                                                | Small                  | low evidence can be related to high self-esteem author has some evidence | Small                  |
| ?individual onto:hasInhibition ?Inhibition .                 | No                  |                                                | Medium                 | important-predict overcontrol-more serious violence                      | Medium                 |

Table S3: Participant characteristics. Pearson correlation coefficient.

| Participant Characteristics | Experiment Mean/SD  | Control Mean/SD       | Test                      | Correlations*                                                          |
|-----------------------------|---------------------|-----------------------|---------------------------|------------------------------------------------------------------------|
| PANAS-Negative affect       | M=20.5<br>SD = 6.58 | M = 19.1<br>SD = 5.96 | (t(77)=-.99,<br>p = 0.33) | $p < .01$ level: agreeableness -.32, neuroticism .34, self-esteem -.49 |
| PANAS-Positive affect       | M = 30.3<br>SD=6.7  | M=30.67<br>SD =5.57   | (t(77)=.33<br>p=0.33)     | $p < .01$ level: extraversion .44, self-esteem .36                     |
| Extraversion                | M=6.43<br>SD =1.95  | M=6.78<br>SD=1.93     | (t(78)=.81<br>p=.42)      | $p < .01$ level: self-esteem .29                                       |
| Agreeableness               | M=7.1<br>SD=1.78    | M=6.8<br>SD=1.5       | (t(78)=-.75<br>p=.46)     | $p < .05$ level: neuroticism-.27, self-esteem .26                      |
| Conscientiousness           | M=7.0<br>SD = 1.6   | M=7.2<br>SD=1.3       | (t(78)=.46<br>p=.46)      | $p < .05$ self-esteem .26                                              |
| Neuroticism                 | M=6.28<br>SD=2.4    | M=5.7<br>SD=1.67      | (t(78)=-1.3<br>, p=.20)   | $p < .05$ level: agreeableness-.27, $p < .01$ level: self-esteem -.42  |
| Openness to experience      | M=6.45<br>SD=2.46   | M=7.05<br>SD=1.99     | (t(78)=.39<br>p=.70)      | No correlations                                                        |
| Self-Esteem                 | M=27.83<br>SD=4.68  | M=28.73<br>SD=5.12    | (t(78)=.82<br>p=.42)      | Correlated with all variables except openness to experience            |

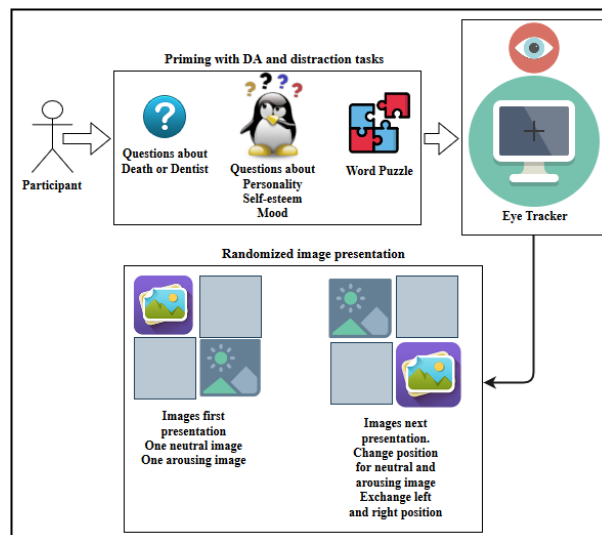

**Figure S1.** Visualization of data gathering procedure related to test data. Images were presented randomly on a display consisting of two images (one neutral, one fetish). It was controlled for natural leftward bias.

## References

1. BioPortal Neurobehavior Ontology. Available online: <http://bioportal.bioontology.org/ontologies/NBO> (accessed on 12.07.2020).
2. Allen Brain Atlas Dataportal. Available online: <http://help.brain-map.org/display/api/Atlas+Drawings+and+Ontologies> (accessed on 12.07.2020).
3. Ashburner, M.; Ball, C. A.; Blake, J. A.; Botstein, D.; Butler, H.; Cherry, J. M.; Davis, A. P.; Dolinski, K.; Dwight, S. S.; Eppig, J. T.; Harris, M. A.; Hill, D. P.; Issel-Tarver, L.; Kasarskis, A.; Lewis, S.; Matese, J. C.; Richardson, J. E.; Ringwald, M.; Rubin, G. M.; Sherlock, G. Gene ontology: tool for the unification of biology. *Nat Genet.* **2000**, *25*, 25-29.
4. The Gene Ontology Consortium. The Gene Ontology Resource: 20 years and still GOing strong. *Nucleic Acids Res.* **2019**, *47*, 330-338.
5. Varoquaux, G.; Schwartz, Y.; Poldrack, R. A.; Gauthier, B.; Bzdok, D.; Poline J-B, et al. Atlases of Cognition with Large-Scale Human Brain Mapping. *PLoS Comput Biol.* **2018**, *14*, 1-18.
6. Köhler, S.; Carmody, L.; Vasilevsky, N.; Jacobsen, J. O. B. et al. Expansion of the Human Phenotype Ontology (HPO) knowledge base and resources. *Nucleic Acids Research.* **2019**, *47*, 1018-1027.
7. Human Phenotype Ontology (HPO). Available online: <https://hpo.jax.org/app/> (accessed on 12.07.2020).
8. OLS Ontology Search Human Disease Ontology. Available online: <https://www.ebi.ac.uk/ols/ontologies/doid> (accessed on 12.07.2020).
9. Bioportal Emotion Ontology. Available online: <http://bioportal.bioontology.org/ontologies/MFOEM> (accessed on 12.07.2020).
10. Bioportal Mental Functioning Ontology Available online: <http://bioportal.bioontology.org/ontologies/MF> (accessed on 12.07.2020).
11. Bioportal Mental State Assessment. Available online: <http://bioportal.bioontology.org/ontologies/ONL-MSA> (accessed on 12.07.2020).
12. Bioportal Neuropsychological Integrative Ontology. Available online: <http://bioportal.bioontology.org/ontologies/NIO> (accessed on 12.07.2020).
13. Bioportal Psychology Ontology (APAONTO). Available online: <https://bioportal.bioontology.org/ontologies/APAONTO> (accessed on 12.07.2020).
14. Laird, A. R.; Lancaster, J.J.; Fox, P.T. BrainMap. *Neuroinform* **2005**, *3*, 65-77.
15. brainmap.org Available online: <https://www.brainmap.org/> (accessed on 12.07.2020).
16. Global Terrorism Database. Managed by the National Consortium for the Study of Terrorism and Responses to Terrorism (START). **2009-2019**. University of Maryland.
17. Global Terrorism Database. Available online: <https://www.start.umd.edu/gtd/> (accessed on 12.07.2020).
18. Poldrack, R. A.; Yarkoni, T. From Brain Maps to Cognitive Ontologies: Informatics and the Search for Mental Structure. *Annu Rev Psychol.* **2016**, *67*, 587-612.
19. Haendel, M. A.; Chute, C. G.; Robinson, P. N. Classification, Ontology, and Precision Medicine. *N. Engl J Med.* **2018**, *379*, 1452-1462.
20. Barhamgi, M.; Masmoudi, A.; Lara-Cabrera, R. Camacho, D. Social networks data analysis with semantics: application to the radicalization problem. *J Amb Intel Hum Comp.* **2018**, 1-15.
21. Barhamgi M.; Lara-Cabrera R.; Benslimane D.; Camacho D. Ontology Uses for Radicalisation Detection on Social Networks. In *Intelligent Data Engineering and Automated Learning (IDEAL)* Yin H.; Camacho D.; Novais P.; Tallón-Ballesteros A. Eds.; Springer Cham: 2018; pp. 3-8.
22. Rodríguez, N. D. A.; Cuéllar, M. P.; Lilius, J.; Calvo-Flores, M. D. Survey on Ontologies for Human Behavior Recognition. *ACM Computing Surveys* **2014**, *46*, 1-33.
23. Masmoudi, A.; Barhamgi, M.; Faci, N.; Saoud, Z.; Belhajjame, K.; Benslimane, D.; Camacho, D. An Ontology-based Approach for Mining Radicalization Indicators from Online Messages. *IEEE 32nd International Conference on Advanced Information Networking and Applications (AINA)* IEEE: Cracow, Poland, 2018; pp. 609-616.
24. Mannes, A.; Golbeck, J. Building a Terrorism Ontology. *SWC Workshop on Ontology Patterns for the Semantic Web*. Springer: Galway, Ireland, **2005**, pp. 1-12.
25. Galjano, P.; Popovich, V. Theoretical Investigation of Terrorism. Ontology Development. In *Information Fusion and Geographic Information Systems. Lecture Notes in Geoinformation and Cartography* Popovich V.V.; Claramunt C.; Schrenk M.; Korolenko K.V. Eds.; Springer: Berlin, Heidelberg 2009; pp. 227-239.
26. The International Centre for Counter-Terrorism —The Hague (ICCT) Available online: <https://icct.nl/> (accessed on 12.07.2020).
27. University of Michigan. Research Guide. Biomedical Ontologies and Controlled Vocabularies. Available online: <https://guides.lib.umich.edu/ontology> (accessed on 12.07.2020)
28. Birnbaum G.; Hirschberger G.; Goldenberg J. Desire in the face of death: Terror management, attachment, and sexual motivation. *Personal Relationship* **2011**, *18*, 1-19.
29. Kucyi, A.; Parvizi, J. Pupillary Dynamics Link Spontaneous and Task-Evoked Activations Recorded Directly from Human Insula. *J Neurosci.* **20**, *40*, 6207-6218.
