# Supplementary material
Source: MDPI journal article supplement (https://www.mdpi.com/2313-433X/7/3/60)

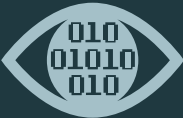

# Journal of *Imaging*

Supplement: s1 [file s1]

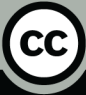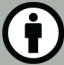

BY

Supplement: s1 [file s1]
